# Supplementary material for: Mechanistic aspects of ammonia synthesis on Ta3N5 surfaces in the presence of intrinsic nitrogen vacancies
Source: Royal Society of Chemistry journal article supplement (doi:10.1039/d1cp00275a), 2021-01-01
Supplement: d1cp00275a1.pdf [file d1cp00275a1.pdf]

## Mechanistic aspects of ammonia synthesis on Ta<sub>3</sub>N<sub>5</sub> surfaces in the presence of intrinsic nitrogen vacancies

Constantinos D. Zeinalipour-Yazdi\*

*School of Health, Sport and Bioscience, University of East London, Stratford  
Campus, Water Lane, London E15 4LZ, UK*

*Department of Natural Sciences, Faculty of Science and Technology, Middlesex  
University, The Burroughs, NW4 4BT, UK*

Figure S1 The Cartesian coordinates of the structure of the various intermediates  
in Figure 3

### Structure A

|      |             |             |              |
|------|-------------|-------------|--------------|
| Ta1  | 1.983949231 | 7.776858157 | 10.330591732 |
| Ta2  | 7.240108842 | 7.776375300 | 12.005539831 |
| Ta3  | 8.359465879 | 2.592739903 | 10.328290597 |
| Ta4  | 3.102711595 | 2.584266744 | 11.996571962 |
| Ta5  | 1.388621580 | 0.539765058 | 10.276742124 |
| Ta6  | 6.539655053 | 0.609300816 | 11.968422364 |
| Ta7  | 8.949992870 | 5.737241400 | 10.287376442 |
| Ta8  | 3.792624419 | 5.806887819 | 11.988599939 |
| Ta9  | 1.467813412 | 4.540073544 | 10.296990317 |
| Ta10 | 6.550778477 | 4.561615276 | 11.976047767 |
| Ta11 | 8.868874190 | 9.731306636 | 10.289161402 |
| Ta12 | 3.784573477 | 9.747693848 | 11.969621488 |
| Ta13 | 2.032282920 | 7.788096477 | 14.131579643 |
| Ta14 | 7.211990696 | 7.795928243 | 15.937258318 |
| Ta15 | 8.311563200 | 2.605903081 | 14.107281892 |
| Ta16 | 3.137006943 | 2.597573892 | 15.890146852 |
| Ta17 | 1.354607120 | 0.603252063 | 14.105611241 |
| Ta18 | 6.537435654 | 0.608584821 | 15.890606068 |
| Ta19 | 8.971006919 | 5.801075022 | 14.123098546 |
| Ta20 | 3.796034724 | 5.804451117 | 15.948416487 |
| Ta21 | 1.373811376 | 4.599330150 | 14.125619745 |
| Ta22 | 6.528834737 | 4.604947477 | 15.906673666 |
| Ta23 | 8.960328427 | 9.780805950 | 14.118630469 |
| Ta24 | 3.805997538 | 9.791728779 | 15.894116187 |
| Ta25 | 2.055292258 | 7.791317408 | 18.021356488 |
| Ta26 | 7.177423728 | 7.861598275 | 19.743884663 |
| Ta27 | 8.291004052 | 2.616734441 | 17.973868234 |
| Ta28 | 3.178910076 | 2.589864047 | 19.709352070 |

|      |             |             |              |
|------|-------------|-------------|--------------|
| Ta29 | 1.377128054 | 0.647668077 | 18.031129880 |
| Ta30 | 6.605670129 | 0.615766164 | 19.722652967 |
| Ta31 | 8.931712282 | 5.834084199 | 18.057509869 |
| Ta32 | 3.657944840 | 5.795851936 | 19.811032439 |
| Ta33 | 1.377857653 | 4.609000874 | 18.043617597 |
| Ta34 | 6.652288271 | 4.479373022 | 19.752195484 |
| Ta35 | 8.968130320 | 9.765369574 | 18.037985689 |
| Ta36 | 3.708300295 | 9.791192631 | 19.732057460 |
| N1   | 8.064550563 | 7.805519497 | 10.173881018 |
| N2   | 2.627439935 | 7.785311478 | 12.154721188 |
| N3   | 2.270470202 | 2.618176751 | 10.168828956 |
| N4   | 7.693165812 | 2.597329881 | 12.143807963 |
| N5   | 0.455753533 | 6.349012566 | 9.820806127  |
| N6   | 3.096017144 | 6.012866853 | 10.151119051 |
| N7   | 5.706485137 | 6.399849181 | 11.992487981 |
| N8   | 8.451217526 | 5.935821173 | 12.130505502 |
| N9   | 9.887028454 | 1.165546781 | 9.829314254  |
| N10  | 7.253203193 | 0.817615493 | 10.136283820 |
| N11  | 4.629613759 | 1.203877462 | 11.972376921 |
| N12  | 1.891077958 | 0.731328564 | 12.118299164 |
| N13  | 0.404504159 | 9.099913301 | 10.423492066 |
| N14  | 3.006007151 | 9.534564315 | 10.046010351 |
| N15  | 5.657959880 | 9.127106153 | 11.982510447 |
| N16  | 8.371681769 | 9.672122248 | 12.143255397 |
| N17  | 9.935817542 | 3.909132209 | 10.459571023 |
| N18  | 7.342761792 | 4.355821396 | 10.044716414 |
| N19  | 4.680578816 | 3.937839439 | 11.988240340 |
| N20  | 1.972659847 | 4.490822419 | 12.150765973 |
| N21  | 7.921975962 | 7.798038257 | 14.025872199 |
| N22  | 2.744711118 | 7.823708820 | 16.031595743 |
| N23  | 2.412891375 | 2.602848706 | 13.995467784 |
| N24  | 7.589802599 | 2.602527570 | 15.999742287 |
| N25  | 0.479326525 | 6.447269425 | 14.146887752 |
| N26  | 3.190714879 | 5.983494028 | 14.034858156 |
| N27  | 5.645260067 | 6.451019633 | 15.932850615 |
| N28  | 8.347164336 | 5.961352502 | 16.033163725 |
| N29  | 9.852806510 | 1.252364279 | 14.114536581 |
| N30  | 7.144890791 | 0.784032126 | 13.995832866 |
| N31  | 4.687650405 | 1.254357655 | 15.874406622 |
| N32  | 1.975497441 | 0.781603287 | 16.016252966 |
| N33  | 0.476998080 | 9.146997349 | 14.125288904 |
| N34  | 3.202195317 | 9.623319553 | 13.980550173 |
| N35  | 5.651571650 | 9.144671781 | 15.907437197 |
| N36  | 8.357028015 | 9.643835487 | 16.024241537 |
| N37  | 9.857763873 | 3.958968900 | 14.115566118 |
| N38  | 7.135905659 | 4.438849063 | 13.982826140 |
| N39  | 4.680133194 | 3.962969326 | 15.908151015 |
| N40  | 1.957867907 | 4.407209160 | 16.029474688 |
| N41  | 7.898019207 | 7.830780237 | 17.890127420 |

|     |             |             |              |
|-----|-------------|-------------|--------------|
| N42 | 2.888576276 | 7.826229820 | 19.868048047 |
| N43 | 2.584185185 | 2.603102418 | 17.878791394 |
| N44 | 7.463925608 | 2.614981382 | 19.850594380 |
| N45 | 0.482200566 | 6.452861404 | 18.068940125 |
| N46 | 3.152208774 | 5.919322115 | 17.904415082 |
| N47 | 2.100839253 | 4.384321988 | 19.922513903 |
| N48 | 8.147176922 | 5.992157730 | 19.920060711 |
| N49 | 9.834143129 | 1.253844061 | 17.984090897 |
| N50 | 7.081072377 | 0.745377064 | 17.882291518 |
| N51 | 4.735439228 | 1.256614825 | 19.982610641 |
| N52 | 2.092565895 | 0.845347660 | 19.921161835 |
| N53 | 0.521633186 | 9.179285837 | 18.039052942 |
| N54 | 3.255686444 | 9.691552417 | 17.889774965 |
| N55 | 5.609474141 | 9.170428617 | 19.851443135 |
| N56 | 8.245983113 | 9.616507165 | 19.927355959 |
| N57 | 9.817455251 | 3.982644544 | 18.000565861 |
| N58 | 7.090609332 | 4.438469790 | 17.875285495 |
| N59 | 4.733496965 | 4.031039151 | 20.004953558 |
| N60 | 5.550388950 | 6.518451867 | 19.233992304 |
| N61 | 5.565875710 | 6.546099221 | 20.590190431 |

### Structure B

|      |             |             |              |
|------|-------------|-------------|--------------|
| Ta1  | 1.982427593 | 7.772815501 | 10.319129460 |
| Ta2  | 7.239676822 | 7.774165031 | 11.990320189 |
| Ta3  | 8.358832110 | 2.591744791 | 10.312050769 |
| Ta4  | 3.102410599 | 2.581614765 | 11.982393436 |
| Ta5  | 1.386655050 | 0.535477673 | 10.261787186 |
| Ta6  | 6.540364591 | 0.607670633 | 11.953574023 |
| Ta7  | 8.949647446 | 5.734371396 | 10.272536402 |
| Ta8  | 3.793015169 | 5.804599759 | 11.978069539 |
| Ta9  | 1.469244415 | 4.538236614 | 10.284610766 |
| Ta10 | 6.550708175 | 4.558939341 | 11.962845769 |
| Ta11 | 8.868372930 | 9.728422184 | 10.273274416 |
| Ta12 | 3.784786386 | 9.745743229 | 11.954109614 |
| Ta13 | 2.037107018 | 7.784237189 | 14.120006161 |
| Ta14 | 7.214641133 | 7.794560030 | 15.920248699 |
| Ta15 | 8.314846109 | 2.606372289 | 14.092082557 |
| Ta16 | 3.143275728 | 2.596230249 | 15.874314361 |
| Ta17 | 1.357181183 | 0.600805427 | 14.089970766 |
| Ta18 | 6.543606081 | 0.608707278 | 15.875047961 |
| Ta19 | 8.975012491 | 5.799046632 | 14.108703290 |
| Ta20 | 3.792743256 | 5.805920959 | 15.947684142 |
| Ta21 | 1.379184105 | 4.598459619 | 14.114713520 |
| Ta22 | 6.529047412 | 4.607391275 | 15.893577946 |
| Ta23 | 8.964304477 | 9.779032084 | 14.100643708 |
| Ta24 | 3.811721699 | 9.790356180 | 15.876113337 |
| Ta25 | 2.071191655 | 7.786169426 | 18.016368448 |
| Ta26 | 7.191900208 | 7.870555148 | 19.726412157 |
| Ta27 | 8.301058051 | 2.620036366 | 17.955966697 |

|      |             |             |              |
|------|-------------|-------------|--------------|
| Ta28 | 3.183902268 | 2.580725666 | 19.689576256 |
| Ta29 | 1.384609741 | 0.644928421 | 18.011164055 |
| Ta30 | 6.618544507 | 0.621789093 | 19.706136469 |
| Ta31 | 8.944434637 | 5.833953390 | 18.041910395 |
| Ta32 | 3.672822253 | 5.786194995 | 19.834780230 |
| Ta33 | 1.392397229 | 4.611700956 | 18.035188615 |
| Ta34 | 6.664575435 | 4.483075287 | 19.739214366 |
| Ta35 | 8.979880681 | 9.765258001 | 18.017538117 |
| Ta36 | 3.718794396 | 9.789717592 | 19.712024410 |
| N1   | 8.063877879 | 7.803255876 | 10.157839863 |
| N2   | 2.629506054 | 7.781728736 | 12.141993074 |
| N3   | 2.270298098 | 2.617434097 | 10.155194417 |
| N4   | 7.695258338 | 2.596519228 | 12.128707539 |
| N5   | 0.455334677 | 6.348182995 | 9.808738834  |
| N6   | 3.095348215 | 6.009069157 | 10.139203368 |
| N7   | 5.706586471 | 6.397353408 | 11.978298424 |
| N8   | 8.452567042 | 5.933162002 | 12.115586683 |
| N9   | 9.885883850 | 1.160659640 | 9.807986672  |
| N10  | 7.251938689 | 0.816778459 | 10.121917212 |
| N11  | 4.629340550 | 1.201475651 | 11.957359043 |
| N12  | 1.891416980 | 0.730000308 | 12.103200131 |
| N13  | 0.402880911 | 9.097564670 | 10.418307686 |
| N14  | 3.002152918 | 9.531312898 | 10.030113143 |
| N15  | 5.657882016 | 9.125015205 | 11.966239090 |
| N16  | 8.369494200 | 9.670649709 | 12.127596341 |
| N17  | 9.935399674 | 3.906555574 | 10.439189641 |
| N18  | 7.340726952 | 4.353201388 | 10.030446932 |
| N19  | 4.680717201 | 3.935530922 | 11.976965103 |
| N20  | 1.971872778 | 4.488443383 | 12.138448867 |
| N21  | 7.923025234 | 7.795629361 | 14.008937675 |
| N22  | 2.752427439 | 7.821466023 | 16.018151262 |
| N23  | 2.414708701 | 2.601190262 | 13.981774004 |
| N24  | 7.596345973 | 2.602369297 | 15.985542934 |
| N25  | 0.482460886 | 6.446074779 | 14.133787296 |
| N26  | 3.194407641 | 5.980152715 | 14.025826948 |
| N27  | 5.646625393 | 6.450384355 | 15.924001282 |
| N28  | 8.353329377 | 5.962260259 | 16.019723156 |
| N29  | 9.855781296 | 1.250481334 | 14.097023889 |
| N30  | 7.147325572 | 0.784674278 | 13.980801202 |
| N31  | 4.693238718 | 1.253308923 | 15.856960806 |
| N32  | 1.980651009 | 0.777369228 | 16.000663681 |
| N33  | 0.479935140 | 9.144665776 | 14.110492031 |
| N34  | 3.204638746 | 9.621177738 | 13.963931898 |
| N35  | 5.657420147 | 9.144518491 | 15.889975592 |
| N36  | 8.362222433 | 9.641584135 | 16.006851754 |
| N37  | 9.861480443 | 3.957803137 | 14.102771037 |
| N38  | 7.137757384 | 4.438029788 | 13.969514558 |
| N39  | 4.683272393 | 3.962737888 | 15.900203602 |
| N40  | 1.965745980 | 4.406775445 | 16.017344902 |

|     |             |             |              |
|-----|-------------|-------------|--------------|
| N41 | 7.898088962 | 7.832754179 | 17.873569398 |
| N42 | 2.898641100 | 7.842720733 | 19.857033279 |
| N43 | 2.589142234 | 2.598553655 | 17.860205299 |
| N44 | 7.477752029 | 2.618125644 | 19.837343458 |
| N45 | 0.486403027 | 6.456481700 | 18.071308795 |
| N46 | 3.153066572 | 5.920755587 | 17.906830484 |
| N47 | 2.101131785 | 4.363415836 | 19.906720616 |
| N48 | 8.153046063 | 5.993852321 | 19.907100690 |
| N49 | 9.843774375 | 1.254854515 | 17.966197525 |
| N50 | 7.092221404 | 0.746246943 | 17.866514191 |
| N51 | 4.750735828 | 1.264918826 | 19.943411370 |
| N52 | 2.105032003 | 0.841704694 | 19.907948530 |
| N53 | 0.530880924 | 9.179378231 | 18.020719292 |
| N54 | 3.266360160 | 9.688878033 | 17.870924633 |
| N55 | 5.623942082 | 9.175576419 | 19.852556252 |
| N56 | 8.263730669 | 9.614524132 | 19.909878564 |
| N57 | 9.823846781 | 3.986100217 | 17.979674895 |
| N58 | 7.089810699 | 4.437831707 | 17.862325088 |
| N59 | 4.740289039 | 4.037946157 | 20.019752500 |
| N60 | 5.550079079 | 6.517442150 | 19.234737348 |
| N61 | 5.584704075 | 6.549637327 | 20.587708249 |
| H1  | 3.000047377 | 5.647143172 | 22.144668684 |
| H2  | 3.673770075 | 5.987486659 | 22.233235995 |

### Structure C

|      |             |             |              |
|------|-------------|-------------|--------------|
| Ta1  | 1.982355114 | 7.774893700 | 10.304692768 |
| Ta2  | 7.240744793 | 7.775919386 | 11.980377727 |
| Ta3  | 8.360114646 | 2.594891292 | 10.298044061 |
| Ta4  | 3.102388728 | 2.583718229 | 11.968493831 |
| Ta5  | 1.386242232 | 0.536504901 | 10.248746814 |
| Ta6  | 6.540314335 | 0.609678360 | 11.939487522 |
| Ta7  | 8.949144893 | 5.738178560 | 10.260122269 |
| Ta8  | 3.793709649 | 5.806915584 | 11.963600827 |
| Ta9  | 1.469410421 | 4.540357198 | 10.271042856 |
| Ta10 | 6.551316957 | 4.561247058 | 11.949461969 |
| Ta11 | 8.867884867 | 9.729661808 | 10.260294679 |
| Ta12 | 3.785524824 | 9.747740334 | 11.939742121 |
| Ta13 | 2.037224362 | 7.787867753 | 14.104832500 |
| Ta14 | 7.222178710 | 7.798806018 | 15.921585753 |
| Ta15 | 8.317117476 | 2.610308730 | 14.076784160 |
| Ta16 | 3.143945771 | 2.599498076 | 15.859037053 |
| Ta17 | 1.356561790 | 0.603069653 | 14.076209416 |
| Ta18 | 6.543332598 | 0.610540419 | 15.858642464 |
| Ta19 | 8.972829137 | 5.805559334 | 14.097854235 |
| Ta20 | 3.795874007 | 5.810012809 | 15.930476866 |
| Ta21 | 1.377629261 | 4.602970190 | 14.100509888 |
| Ta22 | 6.529795734 | 4.612670101 | 15.879808063 |
| Ta23 | 8.963071141 | 9.780158613 | 14.087509643 |
| Ta24 | 3.813820819 | 9.792377793 | 15.861285228 |

|      |             |             |              |
|------|-------------|-------------|--------------|
| Ta25 | 2.071888480 | 7.791877521 | 18.001686835 |
| Ta26 | 7.183210053 | 7.880605336 | 19.754624624 |
| Ta27 | 8.307686072 | 2.625071312 | 17.933397182 |
| Ta28 | 3.186992782 | 2.585316154 | 19.668947496 |
| Ta29 | 1.383386612 | 0.647207340 | 17.994866819 |
| Ta30 | 6.631851976 | 0.636105292 | 19.687081115 |
| Ta31 | 8.935629171 | 5.848716777 | 18.037455916 |
| Ta32 | 3.662698611 | 5.790433178 | 19.811541532 |
| Ta33 | 1.385050615 | 4.619425344 | 18.016534559 |
| Ta34 | 6.664914907 | 4.482741721 | 19.723688286 |
| Ta35 | 8.977415486 | 9.762802998 | 18.005905333 |
| Ta36 | 3.719414482 | 9.801388072 | 19.698977865 |
| N1   | 8.064628569 | 7.804421217 | 10.145857760 |
| N2   | 2.630606729 | 7.784400450 | 12.127033425 |
| N3   | 2.270789308 | 2.619746736 | 10.141879813 |
| N4   | 7.696113237 | 2.599877228 | 12.114619315 |
| N5   | 0.455267220 | 6.350210249 | 9.794435689  |
| N6   | 3.095325771 | 6.011218376 | 10.124924491 |
| N7   | 5.707431549 | 6.399794816 | 11.965495408 |
| N8   | 8.453476542 | 5.935777605 | 12.103350956 |
| N9   | 9.886182109 | 1.161960706 | 9.793017216  |
| N10  | 7.253228403 | 0.818611957 | 10.108391776 |
| N11  | 4.629784734 | 1.203811250 | 11.942189176 |
| N12  | 1.891761914 | 0.732390494 | 12.090001671 |
| N13  | 0.402933305 | 9.099475962 | 10.407379116 |
| N14  | 3.001467467 | 9.533747647 | 10.014681973 |
| N15  | 5.658366551 | 9.127086634 | 11.953026043 |
| N16  | 8.369245862 | 9.672128111 | 12.114565827 |
| N17  | 9.935822678 | 3.908478743 | 10.426068497 |
| N18  | 7.341463697 | 4.356644048 | 10.016622837 |
| N19  | 4.681485013 | 3.937690481 | 11.962870924 |
| N20  | 1.972494587 | 4.490701775 | 12.124977557 |
| N21  | 7.921926482 | 7.797193168 | 13.999739578 |
| N22  | 2.752301712 | 7.825141377 | 16.003030762 |
| N23  | 2.414291873 | 2.603444290 | 13.968754657 |
| N24  | 7.598635408 | 2.606440029 | 15.970623301 |
| N25  | 0.482528140 | 6.449448837 | 14.119537033 |
| N26  | 3.195320747 | 5.984215915 | 14.010052019 |
| N27  | 5.648774459 | 6.455127537 | 15.915734128 |
| N28  | 8.352544939 | 5.966496881 | 16.008568936 |
| N29  | 9.855870776 | 1.252876314 | 14.085021018 |
| N30  | 7.148515047 | 0.787836151 | 13.965580184 |
| N31  | 4.693506055 | 1.256192642 | 15.838549341 |
| N32  | 1.982057606 | 0.777298102 | 15.987725420 |
| N33  | 0.480189301 | 9.147555506 | 14.095085811 |
| N34  | 3.206135924 | 9.623179115 | 13.948952395 |
| N35  | 5.659223440 | 9.146462828 | 15.880910134 |
| N36  | 8.360721846 | 9.642801054 | 15.991558509 |
| N37  | 9.861047102 | 3.961944765 | 14.090170421 |

|     |             |             |              |
|-----|-------------|-------------|--------------|
| N38 | 7.138188951 | 4.441975478 | 13.955874923 |
| N39 | 4.683897162 | 3.966387870 | 15.883756060 |
| N40 | 1.965232140 | 4.411839988 | 16.003036824 |
| N41 | 7.906187581 | 7.836079931 | 17.879801916 |
| N42 | 2.900794141 | 7.841634505 | 19.841979237 |
| N43 | 2.585269158 | 2.601180928 | 17.844222450 |
| N44 | 7.480105629 | 2.617545094 | 19.822537415 |
| N45 | 0.487277023 | 6.461360905 | 18.059234441 |
| N46 | 3.158630514 | 5.925167620 | 17.889334910 |
| N47 | 2.101461488 | 4.375611127 | 19.889749688 |
| N48 | 8.149303845 | 5.984056629 | 19.898053165 |
| N49 | 9.847384275 | 1.260025852 | 17.946291172 |
| N50 | 7.096618087 | 0.747687195 | 17.846547627 |
| N51 | 4.752994279 | 1.271187340 | 19.893693157 |
| N52 | 2.111832839 | 0.840487768 | 19.898161489 |
| N53 | 0.535458991 | 9.184006862 | 18.009355705 |
| N54 | 3.275873658 | 9.689795117 | 17.858010223 |
| N55 | 5.630254248 | 9.183622747 | 19.895759184 |
| N56 | 8.270088810 | 9.643782285 | 19.888972377 |
| N57 | 9.822308099 | 3.992866352 | 17.964113649 |
| N58 | 7.092223593 | 4.442292685 | 17.847525543 |
| N59 | 4.738487524 | 4.042293715 | 19.995721124 |
| N60 | 5.557702875 | 6.531758856 | 19.231557821 |
| N61 | 5.581357598 | 6.538878732 | 20.581846165 |
| H1  | 2.967482045 | 5.653326043 | 22.194246953 |
| H2  | 3.643581253 | 5.983255243 | 22.284093503 |
| H3  | 7.279985303 | 7.690296963 | 22.206816381 |
| H4  | 7.817800462 | 8.216273698 | 22.109404610 |

### Structure D

|      |             |             |              |
|------|-------------|-------------|--------------|
| Ta1  | 1.992231507 | 7.774385901 | 10.301358177 |
| Ta2  | 7.251084251 | 7.776881830 | 11.977959838 |
| Ta3  | 8.370638054 | 2.599463786 | 10.284527133 |
| Ta4  | 3.112224344 | 2.585953559 | 11.964511824 |
| Ta5  | 1.395273923 | 0.534602583 | 10.244719315 |
| Ta6  | 6.550065148 | 0.612437844 | 11.932645667 |
| Ta7  | 8.956927475 | 5.744146695 | 10.255174517 |
| Ta8  | 3.805154976 | 5.808364720 | 11.959479913 |
| Ta9  | 1.479596220 | 4.543212554 | 10.267900464 |
| Ta10 | 6.561893361 | 4.563337647 | 11.941697038 |
| Ta11 | 8.877828082 | 9.731442058 | 10.250822130 |
| Ta12 | 3.796243139 | 9.748646444 | 11.935443531 |
| Ta13 | 2.049316815 | 7.785707906 | 14.101581555 |
| Ta14 | 7.269301245 | 7.794208411 | 15.943918925 |
| Ta15 | 8.331098422 | 2.614520340 | 14.060049743 |
| Ta16 | 3.159559106 | 2.603983547 | 15.850863680 |
| Ta17 | 1.369333809 | 0.598833002 | 14.069604273 |
| Ta18 | 6.544978083 | 0.604389569 | 15.849902870 |
| Ta19 | 8.972980933 | 5.812732162 | 14.100354483 |

|      |             |             |              |
|------|-------------|-------------|--------------|
| Ta20 | 3.818904824 | 5.815580316 | 15.925023372 |
| Ta21 | 1.381318113 | 4.611610662 | 14.096168034 |
| Ta22 | 6.550882168 | 4.621884304 | 15.878430044 |
| Ta23 | 8.972977971 | 9.784909445 | 14.071232627 |
| Ta24 | 3.827312975 | 9.780812067 | 15.858993380 |
| Ta25 | 2.090905039 | 7.782391396 | 18.011398156 |
| Ta26 | 7.244418946 | 8.053183345 | 19.927058680 |
| Ta27 | 8.335085686 | 2.632515327 | 17.892802648 |
| Ta28 | 3.185056996 | 2.579848287 | 19.621460732 |
| Ta29 | 1.395250193 | 0.628398977 | 17.969311705 |
| Ta30 | 6.652524806 | 0.702740174 | 19.675312458 |
| Ta31 | 8.876760472 | 5.903218746 | 18.101181360 |
| Ta32 | 3.583883120 | 5.723202686 | 19.807065151 |
| Ta33 | 1.336853661 | 4.628984795 | 17.984089413 |
| Ta34 | 6.665492626 | 4.451051359 | 19.734251708 |
| Ta35 | 8.995437189 | 9.756356643 | 17.963993870 |
| Ta36 | 3.712550392 | 9.805964201 | 19.714161797 |
| N1   | 8.076338155 | 7.804985266 | 10.140287270 |
| N2   | 2.641398633 | 7.783804235 | 12.121968832 |
| N3   | 2.282982020 | 2.623062078 | 10.141391283 |
| N4   | 7.712056055 | 2.606584270 | 12.102971405 |
| N5   | 0.465124987 | 6.354782981 | 9.796949813  |
| N6   | 3.104220566 | 6.010690393 | 10.120169611 |
| N7   | 5.717452028 | 6.402807784 | 11.958744477 |
| N8   | 8.462032653 | 5.936774735 | 12.098292851 |
| N9   | 9.896857650 | 1.160737277 | 9.779312048  |
| N10  | 7.263897318 | 0.821687457 | 10.101577914 |
| N11  | 4.639895355 | 1.205209337 | 11.938294170 |
| N12  | 1.904799857 | 0.734678327 | 12.086989716 |
| N13  | 0.412002117 | 9.102560372 | 10.413316862 |
| N14  | 3.008402434 | 9.535695409 | 10.009348225 |
| N15  | 5.669565592 | 9.129840832 | 11.945320607 |
| N16  | 8.377010034 | 9.674755208 | 12.105664389 |
| N17  | 9.945483475 | 3.910092961 | 10.409735559 |
| N18  | 7.349620249 | 4.360808216 | 10.009249338 |
| N19  | 4.691865593 | 3.939388649 | 11.957403261 |
| N20  | 1.980170052 | 4.491134218 | 12.123105394 |
| N21  | 7.927478065 | 7.798978961 | 13.998501319 |
| N22  | 2.765971616 | 7.819857260 | 15.998300409 |
| N23  | 2.422946641 | 2.606374471 | 13.972366414 |
| N24  | 7.619916693 | 2.625102090 | 15.964270338 |
| N25  | 0.490486203 | 6.451979487 | 14.120984389 |
| N26  | 3.210659588 | 5.985477519 | 14.003889399 |
| N27  | 5.668844676 | 6.465596693 | 15.940880588 |
| N28  | 8.352695252 | 5.961021019 | 15.999996338 |
| N29  | 9.868805061 | 1.255369148 | 14.077906764 |
| N30  | 7.159494192 | 0.798704167 | 13.957063186 |
| N31  | 4.701348032 | 1.254686065 | 15.829125579 |
| N32  | 2.006337056 | 0.755884606 | 15.978614484 |



|     |             |             |              |
|-----|-------------|-------------|--------------|
| N33 | 0.490167772 | 9.148601210 | 14.082539265 |
| N34 | 3.221817933 | 9.616722968 | 13.943172182 |
| N35 | 5.680586001 | 9.144343069 | 15.888861701 |
| N36 | 8.366047524 | 9.647782018 | 15.971647879 |
| N37 | 9.869790215 | 3.965715298 | 14.079021371 |
| N38 | 7.143202340 | 4.442883166 | 13.950321101 |
| N39 | 4.697614047 | 3.970714760 | 15.868277826 |
| N40 | 1.971765008 | 4.429915838 | 16.004317588 |
| N41 | 8.008721205 | 7.822995541 | 17.905904289 |
| N42 | 2.910183855 | 7.819937398 | 19.843106102 |
| N43 | 2.555276688 | 2.585140596 | 17.820273390 |
| N44 | 7.497214513 | 2.611329785 | 19.830843407 |
| N45 | 0.501615269 | 6.452324290 | 18.084492057 |
| N46 | 3.215816815 | 5.927676357 | 17.893642921 |
| N47 | 2.075695577 | 4.363389377 | 19.893843770 |
| N48 | 8.106286864 | 5.933916180 | 19.920136801 |
| N49 | 9.871990364 | 1.266413022 | 17.898656160 |
| N50 | 7.098733424 | 0.761344525 | 17.827061806 |
| N51 | 4.752493870 | 1.260164734 | 19.791988355 |
| N52 | 2.138084132 | 0.789878246 | 19.890433859 |
| N53 | 0.553073916 | 9.175187403 | 17.979058860 |
| N54 | 3.316693234 | 9.664934200 | 17.864217108 |
| N55 | 5.669089283 | 9.219439894 | 20.132908837 |
| N56 | 8.315253925 | 9.753286523 | 19.841709254 |
| N57 | 9.820164129 | 3.989352053 | 17.944048677 |
| N58 | 7.109945798 | 4.468016384 | 17.860407802 |
| N59 | 4.713914755 | 4.001986199 | 19.762828550 |
| N60 | 5.603998780 | 6.601246673 | 19.609367895 |
| N61 | 5.390171698 | 6.242748816 | 20.928005510 |
| H1  | 2.524973510 | 5.553882321 | 22.547729010 |
| H2  | 3.182337041 | 5.843079608 | 22.764177449 |
| H3  | 5.773598003 | 6.883103087 | 21.651557200 |
| H4  | 7.706298664 | 7.863816326 | 21.650990179 |

### Structure E

|      |             |             |              |
|------|-------------|-------------|--------------|
| Ta1  | 2.021739722 | 7.771283236 | 10.274742321 |
| Ta2  | 7.250975894 | 7.782067305 | 11.993948170 |
| Ta3  | 8.358413628 | 2.598791251 | 10.262744774 |
| Ta4  | 3.126138303 | 2.586544710 | 11.976735269 |
| Ta5  | 1.464189485 | 0.602632484 | 10.225003207 |
| Ta6  | 6.567798450 | 0.616446968 | 11.929908904 |
| Ta7  | 8.906644822 | 5.804089590 | 10.245717638 |
| Ta8  | 3.801330036 | 5.813859229 | 11.974364863 |
| Ta9  | 1.483922168 | 4.560410246 | 10.247153899 |
| Ta10 | 6.561268350 | 4.566411726 | 11.944325809 |
| Ta11 | 8.896268913 | 9.743631508 | 10.231458151 |
| Ta12 | 3.807111628 | 9.750773719 | 11.930925134 |
| Ta13 | 2.065018684 | 7.769092391 | 14.101125449 |
| Ta14 | 7.264359296 | 7.790175564 | 15.941360383 |

|      |             |             |              |
|------|-------------|-------------|--------------|
| Ta15 | 8.344315379 | 2.608840056 | 14.060647988 |
| Ta16 | 3.184309321 | 2.600302088 | 15.841043728 |
| Ta17 | 1.382709474 | 0.587810998 | 14.062006082 |
| Ta18 | 6.567652463 | 0.604703856 | 15.844198791 |
| Ta19 | 8.982830565 | 5.793441749 | 14.096221083 |
| Ta20 | 3.777027249 | 5.828940897 | 15.992983890 |
| Ta21 | 1.398439807 | 4.608286263 | 14.091443855 |
| Ta22 | 6.523795820 | 4.633365204 | 15.864202132 |
| Ta23 | 8.993399015 | 9.775653836 | 14.069512974 |
| Ta24 | 3.843897160 | 9.778157393 | 15.845759384 |
| Ta25 | 2.131730199 | 7.753987169 | 18.049642990 |
| Ta26 | 7.232205290 | 7.935681564 | 19.863056897 |
| Ta27 | 8.357028541 | 2.626919868 | 17.886961637 |
| Ta28 | 3.196461277 | 2.538613925 | 19.641118931 |
| Ta29 | 1.406255411 | 0.617720303 | 17.949444439 |
| Ta30 | 6.699270230 | 0.680776975 | 19.675015130 |
| Ta31 | 8.953604867 | 5.868661433 | 18.049809401 |
| Ta32 | 3.573211820 | 5.668169608 | 20.077168764 |
| Ta33 | 1.407898310 | 4.616502038 | 17.999550754 |
| Ta34 | 6.684709368 | 4.476559911 | 19.711326699 |
| Ta35 | 9.006766847 | 9.739808508 | 17.976964313 |
| Ta36 | 3.737077398 | 9.778498060 | 19.674965008 |
| N1   | 8.087132044 | 7.781575005 | 10.130214747 |
| N2   | 2.631154206 | 7.775716164 | 12.103764588 |
| N3   | 2.283581162 | 2.595408209 | 10.126098381 |
| N4   | 7.738073740 | 2.595994176 | 12.087157355 |
| N5   | 0.450954607 | 6.413246941 | 9.986340490  |
| N6   | 3.088615883 | 5.999336016 | 10.075668367 |
| N7   | 5.702803121 | 6.415886758 | 11.967623027 |
| N8   | 8.448509237 | 5.916297909 | 12.094396164 |
| N9   | 9.926354798 | 1.222965591 | 9.978611885  |
| N10  | 7.294546802 | 0.810167982 | 10.054009241 |
| N11  | 4.668753130 | 1.219636416 | 11.939288673 |
| N12  | 1.936605455 | 0.705407166 | 12.071443224 |
| N13  | 0.440982778 | 9.129298910 | 10.069206489 |
| N14  | 3.071659724 | 9.547721634 | 10.039520177 |
| N15  | 5.701902023 | 9.145506951 | 11.945173127 |
| N16  | 8.433864166 | 9.657255744 | 12.082502109 |
| N17  | 9.935849785 | 3.937981480 | 10.090068200 |
| N18  | 7.306472069 | 4.376907585 | 10.044243585 |
| N19  | 4.674549455 | 3.953589543 | 11.961932361 |
| N20  | 1.946248616 | 4.478536568 | 12.097018376 |
| N21  | 7.923575016 | 7.791636263 | 13.982979631 |
| N22  | 2.783629776 | 7.794654412 | 15.987986428 |
| N23  | 2.421867531 | 2.592670795 | 13.942148059 |
| N24  | 7.629204406 | 2.601079421 | 15.950390830 |
| N25  | 0.495864169 | 6.442714364 | 14.105702947 |
| N26  | 3.220613561 | 5.967110641 | 13.993710521 |
| N27  | 5.654439310 | 6.463605165 | 15.964973803 |

|     |             |             |              |
|-----|-------------|-------------|--------------|
| N28 | 8.353304409 | 5.953266555 | 15.982331217 |
| N29 | 9.881221533 | 1.242283631 | 14.063963248 |
| N30 | 7.173084664 | 0.776674390 | 13.934010089 |
| N31 | 4.720842744 | 1.245460304 | 15.788162810 |
| N32 | 2.009295221 | 0.749715053 | 15.954778611 |
| N33 | 0.500888142 | 9.133001658 | 14.072797305 |
| N34 | 3.222016761 | 9.596053663 | 13.934184062 |
| N35 | 5.694239173 | 9.140685012 | 15.882136769 |
| N36 | 8.384858686 | 9.630898551 | 15.969005503 |
| N37 | 9.881953411 | 3.954706814 | 14.081326469 |
| N38 | 7.155340454 | 4.421416115 | 13.942043712 |
| N39 | 4.691657747 | 3.970482155 | 15.839623657 |
| N40 | 2.001771527 | 4.420218546 | 15.985303351 |
| N41 | 7.991417296 | 7.807377901 | 17.891607482 |
| N42 | 2.919458138 | 7.922815481 | 19.856939571 |
| N43 | 2.643477012 | 2.548703419 | 17.795601142 |
| N44 | 7.523946879 | 2.612787637 | 19.813076412 |
| N45 | 0.510803353 | 6.447400677 | 18.128038938 |
| N46 | 3.190994347 | 5.931138357 | 17.962492568 |
| N47 | 2.054320630 | 4.226203728 | 19.834248549 |
| N48 | 8.174556923 | 5.870093370 | 19.858293903 |
| N49 | 9.877452621 | 1.253555873 | 17.913709428 |
| N50 | 7.116189466 | 0.747491222 | 17.822708439 |
| N51 | 4.803272495 | 1.268723379 | 19.878613910 |
| N52 | 2.148490697 | 0.801999877 | 19.866423738 |
| N53 | 0.563642288 | 9.169007568 | 17.974968843 |
| N54 | 3.315895144 | 9.662105250 | 17.822737860 |
| N55 | 5.662348283 | 9.162921281 | 19.970282545 |
| N56 | 8.295646349 | 9.700837745 | 19.861874435 |
| N57 | 9.833077951 | 3.991217219 | 17.867454920 |
| N58 | 7.013078871 | 4.431403865 | 17.837546051 |
| N59 | 4.724837725 | 4.015665500 | 20.128594469 |
| N60 | 5.671030910 | 6.463272137 | 20.240413308 |
| N61 | 4.932034101 | 6.619068052 | 21.465969568 |
| H1  | 2.633408983 | 5.787516784 | 21.577870039 |
| H2  | 5.360660525 | 6.157565598 | 22.272732432 |
| H3  | 4.763067578 | 7.611165622 | 21.666558053 |
| H4  | 7.785719100 | 7.810609509 | 21.557767134 |

### Structure F

|     |             |             |              |
|-----|-------------|-------------|--------------|
| Ta1 | 2.033198558 | 7.776760973 | 10.292709741 |
| Ta2 | 7.291564809 | 7.779250961 | 11.968647300 |
| Ta3 | 8.413128041 | 2.596187349 | 10.278217618 |
| Ta4 | 3.151282670 | 2.586735188 | 11.958539540 |
| Ta5 | 1.436568329 | 0.535437882 | 10.237298691 |
| Ta6 | 6.591948962 | 0.613075977 | 11.927119531 |
| Ta7 | 9.000764753 | 5.742571527 | 10.242161101 |
| Ta8 | 3.844424011 | 5.810224239 | 11.950390582 |
| Ta9 | 1.522039065 | 4.543216978 | 10.260115477 |

|      |             |             |              |
|------|-------------|-------------|--------------|
| Ta10 | 6.599799175 | 4.564108615 | 11.924490240 |
| Ta11 | 8.917227311 | 9.731126666 | 10.248207671 |
| Ta12 | 3.836476145 | 9.750963451 | 11.930602726 |
| Ta13 | 2.090221990 | 7.788050580 | 14.092867001 |
| Ta14 | 7.300469520 | 7.794911525 | 15.931770301 |
| Ta15 | 8.372247637 | 2.608784346 | 14.054653460 |
| Ta16 | 3.200967284 | 2.603154152 | 15.845920970 |
| Ta17 | 1.402065439 | 0.596742241 | 14.062542719 |
| Ta18 | 6.591703261 | 0.603561122 | 15.848008985 |
| Ta19 | 9.028521252 | 5.807049077 | 14.077777979 |
| Ta20 | 3.842762920 | 5.818682449 | 15.923712995 |
| Ta21 | 1.433264168 | 4.601451965 | 14.092800717 |
| Ta22 | 6.577173158 | 4.626088108 | 15.839933522 |
| Ta23 | 9.005518584 | 9.775149897 | 14.080307083 |
| Ta24 | 3.869613108 | 9.786865710 | 15.851197398 |
| Ta25 | 2.128525513 | 7.788193749 | 18.001548467 |
| Ta26 | 7.144310549 | 7.831573279 | 19.866643764 |
| Ta27 | 8.380984880 | 2.624105393 | 17.889002896 |
| Ta28 | 3.202858795 | 2.565756573 | 19.654604532 |
| Ta29 | 1.408679609 | 0.621823428 | 17.957085315 |
| Ta30 | 6.727730724 | 0.702518006 | 19.681677354 |
| Ta31 | 8.991494534 | 5.881254729 | 18.029174361 |
| Ta32 | 3.805061298 | 5.717967893 | 19.812264322 |
| Ta33 | 1.431431240 | 4.605155087 | 18.014430410 |
| Ta34 | 6.742537620 | 4.549704820 | 19.672235234 |
| Ta35 | 8.983653898 | 9.728744898 | 18.022760243 |
| Ta36 | 3.722252620 | 9.761776332 | 19.690875022 |
| N1   | 8.116214973 | 7.809594722 | 10.130322609 |
| N2   | 2.683093105 | 7.782090128 | 12.113921120 |
| N3   | 2.322718942 | 2.625058722 | 10.132154247 |
| N4   | 7.751626421 | 2.602098364 | 12.095142078 |
| N5   | 0.506225061 | 6.355477660 | 9.780651206  |
| N6   | 3.144651691 | 6.011710457 | 10.110421540 |
| N7   | 5.758157412 | 6.402725242 | 11.944691442 |
| N8   | 8.504922268 | 5.941377830 | 12.084874753 |
| N9   | 9.938250302 | 1.163735619 | 9.774745951  |
| N10  | 7.304140806 | 0.819225317 | 10.094265429 |
| N11  | 4.680513813 | 1.206699933 | 11.933153703 |
| N12  | 1.943205560 | 0.735902665 | 12.078275522 |
| N13  | 0.453881673 | 9.102601183 | 10.400690338 |
| N14  | 3.050983024 | 9.536042946 | 10.002498336 |
| N15  | 5.709466819 | 9.130829505 | 11.940598072 |
| N16  | 8.420594031 | 9.675270023 | 12.102742150 |
| N17  | 9.986713233 | 3.912209755 | 10.406051740 |
| N18  | 7.393121283 | 4.358275386 | 9.995496417  |
| N19  | 4.731677421 | 3.939597339 | 11.946200714 |
| N20  | 2.022270634 | 4.494704059 | 12.114957352 |
| N21  | 7.963802730 | 7.802086098 | 13.988819683 |
| N22  | 2.804872538 | 7.812586344 | 15.989291323 |

|     |             |             |              |
|-----|-------------|-------------|--------------|
| N23 | 2.457896370 | 2.608095151 | 13.960052645 |
| N24 | 7.651972843 | 2.625111901 | 15.953016598 |
| N25 | 0.537152530 | 6.448884298 | 14.099601749 |
| N26 | 3.253978915 | 5.983955096 | 13.997851293 |
| N27 | 5.703406850 | 6.464419602 | 15.924860438 |
| N28 | 8.406917671 | 5.968061584 | 15.980601346 |
| N29 | 9.903870335 | 1.251270641 | 14.072532631 |
| N30 | 7.200796401 | 0.792471614 | 13.953690466 |
| N31 | 4.742477063 | 1.252423038 | 15.813052799 |
| N32 | 2.025809953 | 0.771563847 | 15.970961523 |
| N33 | 0.526669173 | 9.144955974 | 14.084483148 |
| N34 | 3.254768044 | 9.620180990 | 13.935275939 |
| N35 | 5.714802944 | 9.142439319 | 15.884299709 |
| N36 | 8.402699873 | 9.637986468 | 15.983769442 |
| N37 | 9.914988395 | 3.962811904 | 14.079209124 |
| N38 | 7.187746995 | 4.443564998 | 13.926801758 |
| N39 | 4.736818499 | 3.969535576 | 15.845523810 |
| N40 | 2.031313524 | 4.430085433 | 16.001403941 |
| N41 | 8.014465227 | 7.807392553 | 17.907554595 |
| N42 | 2.932276750 | 7.888040044 | 19.834553283 |
| N43 | 2.641666207 | 2.584326293 | 17.820928702 |
| N44 | 7.532412533 | 2.627053993 | 19.791420805 |
| N45 | 0.565595454 | 6.442896364 | 18.076627519 |
| N46 | 3.267233208 | 5.938595908 | 17.913427370 |
| N47 | 2.126546983 | 4.305567942 | 19.891330675 |
| N48 | 8.255055886 | 5.899775124 | 19.884639321 |
| N49 | 9.889038637 | 1.254253634 | 17.921344722 |
| N50 | 7.142262193 | 0.756500109 | 17.825126079 |
| N51 | 4.811252409 | 1.270992300 | 19.949424072 |
| N52 | 2.159684622 | 0.818112222 | 19.883594467 |
| N53 | 0.575155916 | 9.172161863 | 18.009926538 |
| N54 | 3.323421886 | 9.682748803 | 17.833006670 |
| N55 | 5.633496701 | 9.170399738 | 19.950790187 |
| N56 | 8.259730082 | 9.717772735 | 19.877037335 |
| N57 | 9.882834413 | 3.986829638 | 17.917195745 |
| N58 | 7.124866896 | 4.484765685 | 17.819886760 |
| N59 | 4.802905119 | 3.967175472 | 19.962289649 |
| N60 | 5.628959202 | 6.477703656 | 19.924497993 |
| N61 | 3.321527525 | 6.099873252 | 22.044994102 |
| H1  | 2.311634332 | 6.243887142 | 22.128853620 |
| H2  | 3.594240737 | 5.342107787 | 22.675877289 |
| H3  | 3.791721525 | 6.960110646 | 22.337775240 |
| H4  | 7.649360792 | 7.804299326 | 21.579833501 |

### Structure G

|     |             |             |              |
|-----|-------------|-------------|--------------|
| Ta1 | 1.980588088 | 7.786200757 | 10.318186182 |
| Ta2 | 7.239710141 | 7.780799159 | 11.994974915 |
| Ta3 | 8.358624919 | 2.594274778 | 10.306208560 |
| Ta4 | 3.098736604 | 2.589420474 | 11.991472479 |

|      |             |             |              |
|------|-------------|-------------|--------------|
| Ta5  | 1.386527565 | 0.544150010 | 10.273338758 |
| Ta6  | 6.538256297 | 0.614491825 | 11.955793233 |
| Ta7  | 8.947634121 | 5.744683338 | 10.266945030 |
| Ta8  | 3.794125633 | 5.811644529 | 11.967951523 |
| Ta9  | 1.464598628 | 4.545034500 | 10.285532243 |
| Ta10 | 6.549570342 | 4.565271512 | 11.949724927 |
| Ta11 | 8.865762566 | 9.734651505 | 10.277283942 |
| Ta12 | 3.783129079 | 9.753289406 | 11.964772345 |
| Ta13 | 2.028923668 | 7.802128542 | 14.115299884 |
| Ta14 | 7.251539157 | 7.799701739 | 15.958072704 |
| Ta15 | 8.315539494 | 2.609541467 | 14.083960316 |
| Ta16 | 3.141529075 | 2.607349848 | 15.888231914 |
| Ta17 | 1.351038105 | 0.607979529 | 14.104568809 |
| Ta18 | 6.537464777 | 0.604339496 | 15.881126407 |
| Ta19 | 8.971320672 | 5.813219970 | 14.103014507 |
| Ta20 | 3.816646634 | 5.810656794 | 15.903865367 |
| Ta21 | 1.371730144 | 4.605552248 | 14.113243339 |
| Ta22 | 6.540587757 | 4.620180951 | 15.871470039 |
| Ta23 | 8.949977004 | 9.782305632 | 14.111135465 |
| Ta24 | 3.813644438 | 9.796135693 | 15.895320779 |
| Ta25 | 2.044781099 | 7.813924546 | 17.995974063 |
| Ta26 | 7.064053069 | 7.811734938 | 19.902221482 |
| Ta27 | 8.312713545 | 2.620912928 | 17.933231081 |
| Ta28 | 3.165498673 | 2.619476612 | 19.703034715 |
| Ta29 | 1.355466389 | 0.642512481 | 18.017591592 |
| Ta30 | 6.662702058 | 0.690758444 | 19.715042272 |
| Ta31 | 8.916489581 | 5.887912270 | 18.065187224 |
| Ta32 | 3.667834314 | 5.832802400 | 19.744021889 |
| Ta33 | 1.353747982 | 4.599222852 | 18.019724415 |
| Ta34 | 6.661503058 | 4.549426149 | 19.712287548 |
| Ta35 | 8.918748531 | 9.735555682 | 18.065713861 |
| Ta36 | 3.668791444 | 9.793407706 | 19.742889763 |
| N1   | 8.064224135 | 7.810926500 | 10.159349194 |
| N2   | 2.626855794 | 7.794014971 | 12.141001691 |
| N3   | 2.268039901 | 2.621867934 | 10.165110963 |
| N4   | 7.697761140 | 2.600861025 | 12.123609592 |
| N5   | 0.453540150 | 6.355375822 | 9.808113732  |
| N6   | 3.090175893 | 6.018877348 | 10.135093542 |
| N7   | 5.707284625 | 6.403909444 | 11.967541762 |
| N8   | 8.449864867 | 5.941525130 | 12.110150455 |
| N9   | 9.884970110 | 1.166890993 | 9.812681676  |
| N10  | 7.248910147 | 0.819871694 | 10.122473224 |
| N11  | 4.627424626 | 1.209911846 | 11.966896533 |
| N12  | 1.888647046 | 0.737925225 | 12.116626884 |
| N13  | 0.401684129 | 9.104593574 | 10.424526441 |
| N14  | 3.000772034 | 9.545724188 | 10.037085872 |
| N15  | 5.655545510 | 9.132208056 | 11.972822413 |
| N16  | 8.367632798 | 9.678572961 | 12.131727352 |
| N17  | 9.933325940 | 3.913371848 | 10.437476240 |

|     |             |             |              |
|-----|-------------|-------------|--------------|
| N18 | 7.340673081 | 4.358319010 | 10.023711734 |
| N19 | 4.679114433 | 3.942318748 | 11.970277013 |
| N20 | 1.970123538 | 4.496619219 | 12.140630511 |
| N21 | 7.917686382 | 7.804612637 | 14.015278080 |
| N22 | 2.738373450 | 7.820045004 | 16.020374205 |
| N23 | 2.407937072 | 2.611937147 | 13.996630727 |
| N24 | 7.596008790 | 2.626361607 | 15.984889307 |
| N25 | 0.483061319 | 6.452450539 | 14.121882785 |
| N26 | 3.198411488 | 5.996598396 | 14.007617578 |
| N27 | 5.661327058 | 6.466670370 | 15.924527971 |
| N28 | 8.350785019 | 5.967444887 | 16.004663048 |
| N29 | 9.850605813 | 1.257112375 | 14.105548872 |
| N30 | 7.144677891 | 0.794355288 | 13.984713982 |
| N31 | 4.687049473 | 1.257788119 | 15.862640718 |
| N32 | 1.971631560 | 0.785603818 | 16.016228232 |
| N33 | 0.473549832 | 9.153385418 | 14.119435587 |
| N34 | 3.203546496 | 9.627218860 | 13.976900016 |
| N35 | 5.657573116 | 9.145205416 | 15.922752435 |
| N36 | 8.347972543 | 9.642555060 | 16.011933620 |
| N37 | 9.859972358 | 3.965074079 | 14.104222574 |
| N38 | 7.138803511 | 4.443483297 | 13.954005339 |
| N39 | 4.690684599 | 3.969873207 | 15.861361655 |
| N40 | 1.975581525 | 4.440839325 | 16.023245726 |
| N41 | 7.958513699 | 7.808275726 | 17.933640883 |
| N42 | 2.897657715 | 7.814349318 | 19.853986100 |
| N43 | 2.575706051 | 2.615538945 | 17.868415287 |
| N44 | 7.455643756 | 2.621116441 | 19.819235090 |
| N45 | 0.521956605 | 6.443008031 | 18.047661107 |
| N46 | 3.259893412 | 5.937380776 | 17.888919973 |
| N47 | 2.103538098 | 4.396286698 | 19.920434441 |
| N48 | 8.196813856 | 5.903492672 | 19.907253976 |
| N49 | 9.828526844 | 1.257392806 | 17.968555314 |
| N50 | 7.090882288 | 0.751878210 | 17.857503477 |
| N51 | 4.740415230 | 1.266033074 | 19.957171452 |
| N52 | 2.103417306 | 0.843087740 | 19.921486609 |
| N53 | 0.522567582 | 9.181206364 | 18.052541429 |
| N54 | 3.265814226 | 9.693427736 | 17.886873396 |
| N55 | 5.565235837 | 9.166813655 | 19.978474180 |
| N56 | 8.197002084 | 9.717104859 | 19.906777533 |
| N57 | 9.828751975 | 3.980865380 | 17.972667052 |
| N58 | 7.086510393 | 4.492474577 | 17.854225691 |
| N59 | 4.738266203 | 3.977874833 | 19.954276555 |
| N60 | 5.563506655 | 6.460091184 | 19.976555716 |
| H1  | 7.587578808 | 7.807258309 | 21.598832878 |

### Structure H

|     |             |             |              |
|-----|-------------|-------------|--------------|
| Ta1 | 1.989131850 | 7.789255272 | 10.295596317 |
| Ta2 | 7.247729549 | 7.785369359 | 11.974125666 |
| Ta3 | 8.367095791 | 2.598618776 | 10.285177142 |

|      |             |             |              |
|------|-------------|-------------|--------------|
| Ta4  | 3.106815337 | 2.594135049 | 11.967332443 |
| Ta5  | 1.394053140 | 0.546835342 | 10.249615062 |
| Ta6  | 6.547053212 | 0.618484792 | 11.934494635 |
| Ta7  | 8.955500358 | 5.749089540 | 10.246051837 |
| Ta8  | 3.802263473 | 5.816094936 | 11.945573164 |
| Ta9  | 1.472860715 | 4.550095385 | 10.263183919 |
| Ta10 | 6.557727310 | 4.569242213 | 11.929566964 |
| Ta11 | 8.874115471 | 9.738316917 | 10.255987979 |
| Ta12 | 3.791474162 | 9.758410642 | 11.941048537 |
| Ta13 | 2.038358802 | 7.802567649 | 14.092262942 |
| Ta14 | 7.259713944 | 7.800702203 | 15.936932610 |
| Ta15 | 8.324552133 | 2.611044074 | 14.063571545 |
| Ta16 | 3.151585859 | 2.609124994 | 15.863196613 |
| Ta17 | 1.359816846 | 0.609319929 | 14.080200922 |
| Ta18 | 6.546429957 | 0.605183731 | 15.859946465 |
| Ta19 | 8.980107525 | 5.814612184 | 14.081844608 |
| Ta20 | 3.822164557 | 5.812801152 | 15.886249658 |
| Ta21 | 1.381010762 | 4.607462440 | 14.091191526 |
| Ta22 | 6.547622576 | 4.622929223 | 15.850209515 |
| Ta23 | 8.959078261 | 9.783577266 | 14.090159191 |
| Ta24 | 3.822657605 | 9.796952216 | 15.870399433 |
| Ta25 | 2.058291039 | 7.810741832 | 17.974416435 |
| Ta26 | 7.075721393 | 7.814352084 | 19.880691774 |
| Ta27 | 8.323996528 | 2.621269259 | 17.910461075 |
| Ta28 | 3.175207059 | 2.616223815 | 19.676384124 |
| Ta29 | 1.365450284 | 0.639784581 | 17.991447688 |
| Ta30 | 6.673144644 | 0.691657773 | 19.693092598 |
| Ta31 | 8.928250464 | 5.888034088 | 18.043246460 |
| Ta32 | 3.681195075 | 5.826871032 | 19.732259677 |
| Ta33 | 1.365568634 | 4.599012419 | 17.999067455 |
| Ta34 | 6.672603441 | 4.549918293 | 19.687824533 |
| Ta35 | 8.929635442 | 9.734148167 | 18.043542145 |
| Ta36 | 3.678277437 | 9.789653632 | 19.717179603 |
| N1   | 8.072136963 | 7.815425047 | 10.137563797 |
| N2   | 2.636632910 | 7.796487768 | 12.117772006 |
| N3   | 2.276531445 | 2.628043546 | 10.141695623 |
| N4   | 7.707228309 | 2.604415289 | 12.102881671 |
| N5   | 0.460991193 | 6.360990206 | 9.787074245  |
| N6   | 3.099048924 | 6.022828327 | 10.111676377 |
| N7   | 5.715629035 | 6.408137558 | 11.947842615 |
| N8   | 8.458589462 | 5.946109673 | 12.089208219 |
| N9   | 9.893428045 | 1.170675532 | 9.788679150  |
| N10  | 7.257831820 | 0.824080551 | 10.101540926 |
| N11  | 4.636433443 | 1.214341696 | 11.944150881 |
| N12  | 1.897860812 | 0.742597726 | 12.092557706 |
| N13  | 0.410356168 | 9.109321539 | 10.406418985 |
| N14  | 3.008395940 | 9.548926363 | 10.012844020 |
| N15  | 5.663765245 | 9.136485571 | 11.949737341 |
| N16  | 8.376300460 | 9.682463109 | 12.110424852 |



|     |             |             |              |
|-----|-------------|-------------|--------------|
| N17 | 9.941368521 | 3.918175645 | 10.414228403 |
| N18 | 7.348103336 | 4.362166738 | 10.003503438 |
| N19 | 4.687136774 | 3.946650390 | 11.947752111 |
| N20 | 1.978208575 | 4.501301737 | 12.117983495 |
| N21 | 7.924380829 | 7.807438898 | 13.993776364 |
| N22 | 2.749134465 | 7.820156487 | 15.996303064 |
| N23 | 2.415875505 | 2.614962905 | 13.972842469 |
| N24 | 7.605377611 | 2.627569641 | 15.964251259 |
| N25 | 0.491417521 | 6.454849751 | 14.101624712 |
| N26 | 3.207172929 | 5.997792692 | 13.986465917 |
| N27 | 5.668795579 | 6.467742453 | 15.906370751 |
| N28 | 8.360466311 | 5.969886313 | 15.983577144 |
| N29 | 9.859324751 | 1.258929054 | 14.086145446 |
| N30 | 7.153601177 | 0.796648696 | 13.963846732 |
| N31 | 4.696524951 | 1.258649070 | 15.840085033 |
| N32 | 1.981347296 | 0.785612994 | 15.991341798 |
| N33 | 0.482333609 | 9.155239159 | 14.095760758 |
| N34 | 3.212083321 | 9.629375622 | 13.952352782 |
| N35 | 5.666441244 | 9.146127832 | 15.897822173 |
| N36 | 8.357513043 | 9.642613367 | 15.991024719 |
| N37 | 9.868967988 | 3.967388590 | 14.082068932 |
| N38 | 7.147345884 | 4.445883827 | 13.933519691 |
| N39 | 4.699160339 | 3.971278591 | 15.839203300 |
| N40 | 1.984722125 | 4.441353926 | 16.001013926 |
| N41 | 7.968081349 | 7.808571081 | 17.912285146 |
| N42 | 2.908967860 | 7.818633783 | 19.829328989 |
| N43 | 2.585979964 | 2.613455614 | 17.842840246 |
| N44 | 7.465908251 | 2.621839407 | 19.797244756 |
| N45 | 0.531781664 | 6.442478835 | 18.030012782 |
| N46 | 3.267405991 | 5.936257794 | 17.872778613 |
| N47 | 2.110874769 | 4.388717862 | 19.898307034 |
| N48 | 8.207210094 | 5.904033292 | 19.886124627 |
| N49 | 9.839351202 | 1.256880016 | 17.945675419 |
| N50 | 7.101494683 | 0.750523644 | 17.836048633 |
| N51 | 4.751899009 | 1.266269914 | 19.930571231 |
| N52 | 2.115265145 | 0.839653646 | 19.896794418 |
| N53 | 0.532971688 | 9.179685546 | 18.028244776 |
| N54 | 3.276475707 | 9.691900853 | 17.860898635 |
| N55 | 5.575647465 | 9.167365838 | 19.963450322 |
| N56 | 8.207729502 | 9.715549189 | 19.886047981 |
| N57 | 9.839073177 | 3.980866349 | 17.950448903 |
| N58 | 7.097189944 | 4.493286812 | 17.831247720 |
| N59 | 4.748153750 | 3.978603969 | 19.927102449 |
| N60 | 5.575151880 | 6.461789308 | 19.949396410 |
| H1  | 7.592919167 | 7.801541036 | 21.581011110 |
| H2  | 3.507429142 | 5.808976345 | 22.538592052 |
| H3  | 4.168932866 | 6.146151240 | 22.412199134 |

## Structure I

|      |             |             |              |
|------|-------------|-------------|--------------|
| Ta1  | 1.990038476 | 7.780051367 | 10.306662844 |
| Ta2  | 7.241556751 | 7.785168144 | 11.984004637 |
| Ta3  | 8.362759600 | 2.605296421 | 10.290484094 |
| Ta4  | 3.103930970 | 2.593956995 | 11.972404033 |
| Ta5  | 1.392534631 | 0.546353965 | 10.245283469 |
| Ta6  | 6.546246849 | 0.620102767 | 11.940076697 |
| Ta7  | 8.949601076 | 5.751758048 | 10.259807643 |
| Ta8  | 3.796557307 | 5.815920506 | 11.973297247 |
| Ta9  | 1.476868742 | 4.551724279 | 10.273427030 |
| Ta10 | 6.552162102 | 4.569390069 | 11.947506029 |
| Ta11 | 8.874092850 | 9.736457845 | 10.259265567 |
| Ta12 | 3.790303045 | 9.759423594 | 11.939988338 |
| Ta13 | 2.047806862 | 7.790081566 | 14.106093775 |
| Ta14 | 7.249231175 | 7.796756308 | 15.938287753 |
| Ta15 | 8.324089834 | 2.619068014 | 14.070331183 |
| Ta16 | 3.163367499 | 2.606644605 | 15.858409399 |
| Ta17 | 1.359210584 | 0.603856623 | 14.068811025 |
| Ta18 | 6.538187080 | 0.609695635 | 15.858302606 |
| Ta19 | 8.977032335 | 5.809987888 | 14.097701368 |
| Ta20 | 3.780104514 | 5.842389287 | 15.968327880 |
| Ta21 | 1.387052988 | 4.613872754 | 14.107076544 |
| Ta22 | 6.522448309 | 4.633815484 | 15.872782353 |
| Ta23 | 8.966427281 | 9.786003597 | 14.083835868 |
| Ta24 | 3.815605211 | 9.781613323 | 15.858853372 |
| Ta25 | 2.106489945 | 7.791410755 | 18.049583750 |
| Ta26 | 7.168774019 | 7.911388652 | 19.873315331 |
| Ta27 | 8.341241701 | 2.626428141 | 17.895973547 |
| Ta28 | 3.171682241 | 2.532074055 | 19.653980540 |
| Ta29 | 1.378216794 | 0.625504325 | 17.958479092 |
| Ta30 | 6.678252213 | 0.682188166 | 19.686635795 |
| Ta31 | 8.921634845 | 5.886935066 | 18.058228070 |
| Ta32 | 3.634730663 | 5.617021046 | 19.930437218 |
| Ta33 | 1.366965265 | 4.636502629 | 18.002963337 |
| Ta34 | 6.724551013 | 4.476942192 | 19.735996730 |
| Ta35 | 8.969148691 | 9.740302896 | 17.990968998 |
| Ta36 | 3.677643744 | 9.754541440 | 19.707588163 |
| N1   | 8.071627925 | 7.811956419 | 10.146836651 |
| N2   | 2.642546186 | 7.786104285 | 12.127156588 |
| N3   | 2.278246315 | 2.632239046 | 10.145564135 |
| N4   | 7.708907335 | 2.608937773 | 12.110323217 |
| N5   | 0.458133651 | 6.368312626 | 9.813271499  |
| N6   | 3.096911316 | 6.013533394 | 10.126968610 |
| N7   | 5.708770058 | 6.409580756 | 11.964929694 |
| N8   | 8.455067566 | 5.941960682 | 12.103653632 |
| N9   | 9.891604532 | 1.170943241 | 9.791514643  |
| N10  | 7.258790305 | 0.826720003 | 10.107860463 |
| N11  | 4.635537863 | 1.215121858 | 11.944771259 |
| N12  | 1.897720675 | 0.746599366 | 12.086802706 |

|     |             |             |              |
|-----|-------------|-------------|--------------|
| N13 | 0.409349221 | 9.110784701 | 10.410186450 |
| N14 | 3.004465298 | 9.542900110 | 10.015114420 |
| N15 | 5.664419810 | 9.138410326 | 11.951137734 |
| N16 | 8.375292431 | 9.681627621 | 12.114169230 |
| N17 | 9.938191995 | 3.918544425 | 10.399007691 |
| N18 | 7.340076637 | 4.366149065 | 10.018023952 |
| N19 | 4.682681994 | 3.946703478 | 11.967856159 |
| N20 | 1.967477287 | 4.499294882 | 12.129247182 |
| N21 | 7.912543051 | 7.807164155 | 14.001055060 |
| N22 | 2.774362060 | 7.827551786 | 15.988256792 |
| N23 | 2.409054516 | 2.619309975 | 13.977061960 |
| N24 | 7.609463519 | 2.631959691 | 15.972257805 |
| N25 | 0.486336681 | 6.456772902 | 14.122432452 |
| N26 | 3.203969546 | 5.981371972 | 14.019418823 |
| N27 | 5.649472122 | 6.473900932 | 15.962384352 |
| N28 | 8.343959629 | 5.966058977 | 15.995787583 |
| N29 | 9.858094730 | 1.258150097 | 14.086657673 |
| N30 | 7.154217293 | 0.800393363 | 13.968050231 |
| N31 | 4.696028451 | 1.260261374 | 15.820659795 |
| N32 | 1.986299736 | 0.767527010 | 15.974939983 |
| N33 | 0.481418023 | 9.151557668 | 14.086020850 |
| N34 | 3.206639957 | 9.631569448 | 13.939652237 |
| N35 | 5.669856766 | 9.151099827 | 15.890165755 |
| N36 | 8.362117876 | 9.640662963 | 15.991955166 |
| N37 | 9.867173450 | 3.969685001 | 14.092983353 |
| N38 | 7.132576202 | 4.444236002 | 13.952310461 |
| N39 | 4.681272510 | 3.983341104 | 15.872697261 |
| N40 | 1.977726586 | 4.445023826 | 16.024053470 |
| N41 | 7.965344635 | 7.807863386 | 17.912658855 |
| N42 | 2.837267591 | 7.959081180 | 19.868309851 |
| N43 | 2.597028324 | 2.568403833 | 17.827087666 |
| N44 | 7.516364657 | 2.607729456 | 19.829078996 |
| N45 | 0.497723425 | 6.446335225 | 18.108029913 |
| N46 | 3.201126515 | 5.986317498 | 17.953066727 |
| N47 | 2.090190008 | 4.296599782 | 19.892480679 |
| N48 | 8.177316562 | 5.904943578 | 19.892136738 |
| N49 | 9.847735386 | 1.255953518 | 17.926931179 |
| N50 | 7.093374355 | 0.762124620 | 17.837909886 |
| N51 | 4.778261231 | 1.284445402 | 19.909150810 |
| N52 | 2.114457738 | 0.810518700 | 19.886709508 |
| N53 | 0.525891209 | 9.177347830 | 17.985478450 |
| N54 | 3.280211776 | 9.678981658 | 17.842136142 |
| N55 | 5.607776536 | 9.164415140 | 19.931969549 |
| N56 | 8.234872785 | 9.692723990 | 19.879013220 |
| N57 | 9.829411166 | 3.990034652 | 17.911974984 |
| N58 | 7.047416380 | 4.471638975 | 17.864055339 |
| N59 | 4.766645732 | 3.973718951 | 19.972058544 |
| N60 | 5.592595847 | 6.459117866 | 20.298921306 |
| H1  | 7.741003340 | 7.839473489 | 21.556248999 |

|    |             |             |              |
|----|-------------|-------------|--------------|
| H2 | 3.219101328 | 6.087967382 | 21.616913573 |
| H3 | 5.467041915 | 6.631415661 | 21.314367786 |

### Structure J

|      |             |             |              |
|------|-------------|-------------|--------------|
| Ta1  | 1.985388669 | 7.768733414 | 10.306026937 |
| Ta2  | 7.250506806 | 7.763650764 | 11.975476574 |
| Ta3  | 8.358089244 | 2.587255985 | 10.272363076 |
| Ta4  | 3.096797613 | 2.581803092 | 11.974699567 |
| Ta5  | 1.393493334 | 0.538702750 | 10.253163675 |
| Ta6  | 6.539637563 | 0.597557450 | 11.915563747 |
| Ta7  | 8.934474703 | 5.750187472 | 10.249157270 |
| Ta8  | 3.794447947 | 5.803010017 | 11.958320685 |
| Ta9  | 1.454908926 | 4.538233045 | 10.275751717 |
| Ta10 | 6.547697927 | 4.550764963 | 11.929398638 |
| Ta11 | 8.873211929 | 9.721134750 | 10.244423605 |
| Ta12 | 3.790880178 | 9.740267437 | 11.938028094 |
| Ta13 | 2.035052082 | 7.777031510 | 14.107840882 |
| Ta14 | 7.262919081 | 7.791268723 | 15.946112752 |
| Ta15 | 8.329195130 | 2.593993876 | 14.038018846 |
| Ta16 | 3.146132523 | 2.597207071 | 15.868797809 |
| Ta17 | 1.354640653 | 0.595675653 | 14.075256789 |
| Ta18 | 6.539042060 | 0.590671446 | 15.823262651 |
| Ta19 | 8.967406182 | 5.809439764 | 14.091177962 |
| Ta20 | 3.804732872 | 5.811915251 | 15.930967830 |
| Ta21 | 1.371699216 | 4.590408682 | 14.106304365 |
| Ta22 | 6.531345480 | 4.597032033 | 15.847125525 |
| Ta23 | 8.958447736 | 9.756596904 | 14.072391424 |
| Ta24 | 3.819590681 | 9.773890737 | 15.857079518 |
| Ta25 | 2.040336019 | 7.804145686 | 18.013526135 |
| Ta26 | 7.110503239 | 7.930651961 | 19.925403946 |
| Ta27 | 8.359333788 | 2.542837171 | 17.857094623 |
| Ta28 | 3.188734684 | 2.564604282 | 19.678675568 |
| Ta29 | 1.379444151 | 0.628471248 | 17.968812529 |
| Ta30 | 6.631694874 | 0.610883005 | 19.648212202 |
| Ta31 | 8.839620088 | 5.843410800 | 18.037782167 |
| Ta32 | 3.549786544 | 5.775657178 | 19.843632071 |
| Ta33 | 1.336285131 | 4.627854267 | 18.008841534 |
| Ta34 | 6.743179227 | 4.274046323 | 19.680350072 |
| Ta35 | 8.936133360 | 9.695498247 | 18.001066572 |
| Ta36 | 3.656869872 | 9.809738435 | 19.696401297 |
| N1   | 8.073764381 | 7.779064010 | 10.130247913 |
| N2   | 2.623335050 | 7.774019530 | 12.132792072 |
| N3   | 2.266681789 | 2.606013183 | 10.151483458 |
| N4   | 7.695058773 | 2.586599239 | 12.090091157 |
| N5   | 0.457234322 | 6.345511065 | 9.816300747  |
| N6   | 3.101261777 | 6.008937906 | 10.123500799 |
| N7   | 5.711143747 | 6.391170860 | 11.958780578 |
| N8   | 8.454550515 | 5.913406306 | 12.098059530 |
| N9   | 9.889737578 | 1.155082014 | 9.799641713  |

|     |             |             |              |
|-----|-------------|-------------|--------------|
| N10 | 7.255078010 | 0.802945270 | 10.084086605 |
| N11 | 4.629272053 | 1.196330358 | 11.939635168 |
| N12 | 1.894562693 | 0.718966249 | 12.100021713 |
| N13 | 0.407664740 | 9.092275410 | 10.379703426 |
| N14 | 3.010937840 | 9.529259012 | 10.024927142 |
| N15 | 5.663415549 | 9.115441021 | 11.939602668 |
| N16 | 8.376360656 | 9.658417691 | 12.099764775 |
| N17 | 9.931938890 | 3.894461297 | 10.382147353 |
| N18 | 7.333179950 | 4.351931333 | 10.005745644 |
| N19 | 4.674568917 | 3.931132852 | 11.956002647 |
| N20 | 1.962241137 | 4.496559354 | 12.132773037 |
| N21 | 7.922339193 | 7.778905370 | 14.005532494 |
| N22 | 2.742801463 | 7.805552679 | 16.020574344 |
| N23 | 2.403304186 | 2.608848624 | 13.987416701 |
| N24 | 7.619479552 | 2.573368662 | 15.935261059 |
| N25 | 0.479760244 | 6.440820284 | 14.120840035 |
| N26 | 3.211451988 | 5.982923233 | 14.019781137 |
| N27 | 5.669363199 | 6.442048724 | 15.953805063 |
| N28 | 8.356619038 | 5.932845126 | 16.021800663 |
| N29 | 9.856228328 | 1.237224711 | 14.070099258 |
| N30 | 7.148703533 | 0.769289578 | 13.938774674 |
| N31 | 4.689105696 | 1.241824537 | 15.825620842 |
| N32 | 1.984372626 | 0.769096817 | 15.992210442 |
| N33 | 0.479765769 | 9.137860999 | 14.100036951 |
| N34 | 3.211659721 | 9.604442654 | 13.956242018 |
| N35 | 5.666052138 | 9.121973549 | 15.888284432 |
| N36 | 8.358810182 | 9.630039090 | 15.988483512 |
| N37 | 9.863400886 | 3.952762139 | 14.092248866 |
| N38 | 7.136590146 | 4.421045310 | 13.940240101 |
| N39 | 4.681314581 | 3.960554723 | 15.855205310 |
| N40 | 1.963264622 | 4.449951372 | 16.041148903 |
| N41 | 7.977366847 | 7.799674521 | 17.939293479 |
| N42 | 2.850759110 | 7.880005281 | 19.865042129 |
| N43 | 2.606528427 | 2.614401929 | 17.860991659 |
| N44 | 7.591772462 | 2.494129193 | 19.812658133 |
| N45 | 0.462852804 | 6.431749961 | 18.071579019 |
| N46 | 3.268965624 | 5.954009892 | 17.944342303 |
| N47 | 2.118034726 | 4.399741151 | 19.974033912 |
| N48 | 7.863844826 | 5.912311519 | 19.887842887 |
| N49 | 9.852004364 | 1.215266839 | 17.887616870 |
| N50 | 7.082007200 | 0.721260994 | 17.810408198 |
| N51 | 4.741740154 | 1.284128652 | 19.966891490 |
| N52 | 2.091697178 | 0.869475645 | 19.892065703 |
| N53 | 0.520406119 | 9.166401015 | 18.027249480 |
| N54 | 3.252075111 | 9.688851135 | 17.853079737 |
| N55 | 5.570379602 | 9.155052298 | 19.770506309 |
| N56 | 8.204505510 | 9.669459493 | 19.902680963 |
| N57 | 9.829553490 | 3.963415409 | 17.995746858 |
| N58 | 7.099213324 | 4.354753154 | 17.810629998 |

|     |             |             |              |
|-----|-------------|-------------|--------------|
| N59 | 4.800817716 | 4.205557111 | 19.896877133 |
| N60 | 5.262052454 | 6.759954108 | 20.995614247 |
| H1  | 7.669654953 | 7.942549333 | 21.614835275 |
| H2  | 4.880157965 | 7.564082129 | 21.503217198 |
| H3  | 5.683614334 | 6.164999707 | 21.716741150 |

### Structure K

|      |             |             |              |
|------|-------------|-------------|--------------|
| Ta1  | 1.954963620 | 7.751817730 | 10.283750841 |
| Ta2  | 7.212214135 | 7.759196077 | 11.964191462 |
| Ta3  | 8.329373740 | 2.589128943 | 10.281033242 |
| Ta4  | 3.065399212 | 2.561079205 | 11.950107871 |
| Ta5  | 1.369920213 | 0.533022325 | 10.211698405 |
| Ta6  | 6.512607417 | 0.595401176 | 11.919575601 |
| Ta7  | 8.925142051 | 5.720422102 | 10.253232344 |
| Ta8  | 3.764229736 | 5.782984017 | 11.956090810 |
| Ta9  | 1.461082563 | 4.524406216 | 10.247690373 |
| Ta10 | 6.518693311 | 4.542707748 | 11.946018895 |
| Ta11 | 8.859991306 | 9.712546903 | 10.242125886 |
| Ta12 | 3.759513067 | 9.732186158 | 11.908351582 |
| Ta13 | 2.034891682 | 7.757359951 | 14.065027963 |
| Ta14 | 7.210525349 | 7.791337744 | 15.906942807 |
| Ta15 | 8.302769330 | 2.610360962 | 14.067895331 |
| Ta16 | 3.118585619 | 2.574388323 | 15.868050565 |
| Ta17 | 1.342042862 | 0.586542746 | 14.028875616 |
| Ta18 | 6.486131273 | 0.598422563 | 15.821186236 |
| Ta19 | 8.973251070 | 5.788533238 | 14.085773145 |
| Ta20 | 3.749170925 | 5.853688606 | 15.944470602 |
| Ta21 | 1.390244505 | 4.574987870 | 14.095676796 |
| Ta22 | 6.469852820 | 4.588785988 | 15.877901947 |
| Ta23 | 8.956529003 | 9.764186741 | 14.044644052 |
| Ta24 | 3.767696324 | 9.728305607 | 15.833765807 |
| Ta25 | 2.111975056 | 7.770986655 | 17.987368609 |
| Ta26 | 7.263319693 | 8.098288422 | 19.804506020 |
| Ta27 | 8.289790232 | 2.601357736 | 17.906551171 |
| Ta28 | 2.992000725 | 2.319238484 | 19.713239463 |
| Ta29 | 1.344804915 | 0.537939237 | 17.883177327 |
| Ta30 | 6.612929916 | 0.727909093 | 19.667329557 |
| Ta31 | 8.971393163 | 5.833281835 | 17.986463108 |
| Ta32 | 3.410918253 | 5.846380694 | 19.873211819 |
| Ta33 | 1.408538081 | 4.527915808 | 18.004751311 |
| Ta34 | 6.883551592 | 4.553187309 | 19.782810074 |
| Ta35 | 8.958583440 | 9.766099630 | 17.910470099 |
| Ta36 | 3.622946679 | 9.672694961 | 19.713854494 |
| N1   | 8.038465859 | 7.783324795 | 10.134712025 |
| N2   | 2.631685255 | 7.761119983 | 12.098867280 |
| N3   | 2.252335168 | 2.591417682 | 10.112417278 |
| N4   | 7.700049380 | 2.596310809 | 12.112589692 |
| N5   | 0.424430739 | 6.349784002 | 9.808253018  |
| N6   | 3.053254979 | 5.971408616 | 10.097937385 |

|     |             |             |              |
|-----|-------------|-------------|--------------|
| N7  | 5.677850196 | 6.381372630 | 11.950182632 |
| N8  | 8.440735027 | 5.910473545 | 12.103470480 |
| N9  | 9.856287299 | 1.128202380 | 9.747458713  |
| N10 | 7.224869175 | 0.818006584 | 10.097245819 |
| N11 | 4.603041359 | 1.189514495 | 11.914928832 |
| N12 | 1.864449773 | 0.722128626 | 12.059433874 |
| N13 | 0.377349336 | 9.080754904 | 10.413324073 |
| N14 | 2.959733627 | 9.521793545 | 9.976285548  |
| N15 | 5.637689225 | 9.113749853 | 11.926011394 |
| N16 | 8.344414056 | 9.661716970 | 12.100669723 |
| N17 | 9.906263121 | 3.890569170 | 10.331400923 |
| N18 | 7.293243203 | 4.340342511 | 10.022441704 |
| N19 | 4.650090200 | 3.916689514 | 11.960195594 |
| N20 | 1.919844689 | 4.447660712 | 12.104297472 |
| N21 | 7.892661427 | 7.778272695 | 13.993533902 |
| N22 | 2.754048355 | 7.789342227 | 15.965259403 |
| N23 | 2.384626813 | 2.581003196 | 13.981354705 |
| N24 | 7.587875152 | 2.607440859 | 15.981409840 |
| N25 | 0.475835806 | 6.432087696 | 14.099247353 |
| N26 | 3.165214690 | 5.916823466 | 13.981378887 |
| N27 | 5.630139157 | 6.439845639 | 15.927060356 |
| N28 | 8.377189917 | 5.978106439 | 16.027873763 |
| N29 | 9.835489404 | 1.232824295 | 14.070698966 |
| N30 | 7.116303524 | 0.788646892 | 13.954382934 |
| N31 | 4.650798900 | 1.234202991 | 15.818381190 |
| N32 | 1.962275856 | 0.702454684 | 15.957274301 |
| N33 | 0.461443165 | 9.122456052 | 14.044779630 |
| N34 | 3.184584755 | 9.627463659 | 13.907233854 |
| N35 | 5.638496804 | 9.132111918 | 15.849378319 |
| N36 | 8.345173464 | 9.631044865 | 15.973485655 |
| N37 | 9.850299274 | 3.948716961 | 14.098533349 |
| N38 | 7.108136962 | 4.435821539 | 13.969916129 |
| N39 | 4.647943148 | 3.941032265 | 15.875680938 |
| N40 | 1.946792391 | 4.417111662 | 16.040205056 |
| N41 | 7.825246957 | 7.854546792 | 17.908371620 |
| N42 | 2.874215402 | 7.822080425 | 20.009675383 |
| N43 | 2.493839653 | 2.503524405 | 17.859659190 |
| N44 | 7.484549977 | 2.568850590 | 19.880607501 |
| N45 | 0.537101234 | 6.385513048 | 18.078847296 |
| N46 | 3.254523050 | 5.887490214 | 17.945284579 |
| N47 | 2.234034923 | 4.238276341 | 20.020508353 |
| N48 | 8.140733901 | 6.051983446 | 19.920943940 |
| N49 | 9.831499639 | 1.232062862 | 17.880419565 |
| N50 | 7.033205935 | 0.759857371 | 17.831544424 |
| N51 | 4.684460400 | 1.340689261 | 19.927895719 |
| N52 | 1.987015317 | 0.664781875 | 19.905782877 |
| N53 | 0.467161941 | 9.100706504 | 17.937284969 |
| N54 | 3.268944537 | 9.650694433 | 17.844090931 |
| N55 | 5.605484864 | 9.119017845 | 19.855905954 |

|     |             |             |              |
|-----|-------------|-------------|--------------|
| N56 | 8.273619135 | 9.732745716 | 19.933981309 |
| N57 | 9.827623420 | 3.968499795 | 18.013362860 |
| N58 | 7.068007085 | 4.465417148 | 17.876700918 |
| N59 | 5.202227261 | 5.310702762 | 20.370937019 |
| N60 | 6.917505456 | 7.484723570 | 22.041615037 |
| H1  | 6.597443170 | 8.211244328 | 22.684959252 |
| H2  | 6.178871596 | 6.768340416 | 21.956011465 |
| H3  | 7.746006875 | 7.027157845 | 22.428883866 |

### Structure O

|      |             |             |              |
|------|-------------|-------------|--------------|
| Ta1  | 1.982420484 | 7.745018516 | 10.286430793 |
| Ta2  | 7.234861065 | 7.754102022 | 11.976717000 |
| Ta3  | 8.318001556 | 2.580408102 | 10.295463397 |
| Ta4  | 3.084410403 | 2.564391224 | 11.970751044 |
| Ta5  | 1.384707720 | 0.542654119 | 10.232619437 |
| Ta6  | 6.527763126 | 0.588361787 | 11.936853934 |
| Ta7  | 8.901611372 | 5.750361025 | 10.260038810 |
| Ta8  | 3.783459067 | 5.776541960 | 11.951423624 |
| Ta9  | 1.421297005 | 4.524844723 | 10.272149474 |
| Ta10 | 6.539573618 | 4.540781566 | 11.970870849 |
| Ta11 | 8.867744803 | 9.720735186 | 10.237105244 |
| Ta12 | 3.780012256 | 9.723455754 | 11.923969855 |
| Ta13 | 2.013545934 | 7.752706652 | 14.088933493 |
| Ta14 | 7.213721765 | 7.784439562 | 15.906417880 |
| Ta15 | 8.297521846 | 2.609049540 | 14.089991731 |
| Ta16 | 3.127419362 | 2.579400800 | 15.876145562 |
| Ta17 | 1.339295813 | 0.586005571 | 14.053259322 |
| Ta18 | 6.540401943 | 0.615284242 | 15.853331849 |
| Ta19 | 8.940663180 | 5.799474847 | 14.115799583 |
| Ta20 | 3.815979070 | 5.782373139 | 15.913230059 |
| Ta21 | 1.353122208 | 4.571681177 | 14.110864083 |
| Ta22 | 6.553694218 | 4.564650162 | 15.936269329 |
| Ta23 | 8.954211822 | 9.760760116 | 14.057946649 |
| Ta24 | 3.818290988 | 9.771244827 | 15.829394440 |
| Ta25 | 2.045805219 | 7.777521322 | 17.955802315 |
| Ta26 | 7.334412908 | 8.077882584 | 19.748331781 |
| Ta27 | 8.279131134 | 2.621705731 | 17.974441495 |
| Ta28 | 3.051179641 | 2.344342667 | 19.713272781 |
| Ta29 | 1.378081414 | 0.577694404 | 17.916003597 |
| Ta30 | 6.682872155 | 0.726268981 | 19.724340599 |
| Ta31 | 8.906248325 | 5.852111101 | 18.037275092 |
| Ta32 | 3.428675343 | 5.839789909 | 19.852273689 |
| Ta33 | 1.376575574 | 4.574299925 | 18.017697952 |
| Ta34 | 6.922968276 | 4.545902607 | 19.873417138 |
| Ta35 | 8.978559489 | 9.836607096 | 17.915651521 |
| Ta36 | 3.715368015 | 9.694060436 | 19.697018700 |
| N1   | 8.053098717 | 7.760142058 | 10.135233911 |
| N2   | 2.588495872 | 7.753525034 | 12.121954520 |
| N3   | 2.252955786 | 2.576514598 | 10.145235167 |



|     |             |             |              |
|-----|-------------|-------------|--------------|
| N4  | 7.694959571 | 2.578516872 | 12.126021243 |
| N5  | 0.438710783 | 6.336712295 | 9.845644784  |
| N6  | 3.089771060 | 5.987263607 | 10.109913760 |
| N7  | 5.690846850 | 6.381355516 | 11.969953514 |
| N8  | 8.441101385 | 5.895704160 | 12.111441694 |
| N9  | 9.867369379 | 1.155804063 | 9.828428315  |
| N10 | 7.226152603 | 0.798350525 | 10.097890743 |
| N11 | 4.616190114 | 1.181495516 | 11.946380189 |
| N12 | 1.874210929 | 0.689030464 | 12.086515629 |
| N13 | 0.398281208 | 9.079412004 | 10.259079928 |
| N14 | 3.021275866 | 9.513885211 | 10.027864736 |
| N15 | 5.659544249 | 9.105355830 | 11.948892482 |
| N16 | 8.382660115 | 9.658711016 | 12.096040813 |
| N17 | 9.904549201 | 3.881039678 | 10.317058501 |
| N18 | 7.294153577 | 4.344805746 | 10.043241698 |
| N19 | 4.654669250 | 3.916420205 | 11.972644114 |
| N20 | 1.923980817 | 4.469439013 | 12.130893889 |
| N21 | 7.922944185 | 7.784396280 | 13.997669703 |
| N22 | 2.726185911 | 7.780879828 | 16.011461483 |
| N23 | 2.399711276 | 2.578179366 | 13.989591315 |
| N24 | 7.587898735 | 2.599595886 | 15.999767238 |
| N25 | 0.465708577 | 6.418294578 | 14.116523471 |
| N26 | 3.205370024 | 5.957081664 | 14.012204697 |
| N27 | 5.659460742 | 6.435462044 | 15.926862393 |
| N28 | 8.363900817 | 5.951512003 | 16.052519976 |
| N29 | 9.848422804 | 1.236362470 | 14.075516515 |
| N30 | 7.131793270 | 0.764539467 | 13.964664852 |
| N31 | 4.681170438 | 1.237199138 | 15.845920144 |
| N32 | 1.988888340 | 0.722042543 | 15.977117552 |
| N33 | 0.466684556 | 9.122417802 | 14.090617410 |
| N34 | 3.203291660 | 9.576952077 | 13.944480961 |
| N35 | 5.663599444 | 9.138114288 | 15.857865071 |
| N36 | 8.357520257 | 9.660138555 | 15.987370318 |
| N37 | 9.846995280 | 3.937327625 | 14.132754512 |
| N38 | 7.126899175 | 4.429157649 | 13.985659619 |
| N39 | 4.684573746 | 3.936730289 | 15.902113410 |
| N40 | 1.955086005 | 4.410668463 | 16.047577367 |
| N41 | 7.826666845 | 7.877278430 | 17.888114760 |
| N42 | 2.864178129 | 7.840903735 | 19.916718049 |
| N43 | 2.535673854 | 2.519796060 | 17.871827022 |
| N44 | 7.508404258 | 2.568375819 | 19.967229833 |
| N45 | 0.499840964 | 6.415670963 | 18.065284964 |
| N46 | 3.258415035 | 5.922743496 | 17.936062810 |
| N47 | 2.226520141 | 4.265004043 | 19.992968619 |
| N48 | 8.082739304 | 6.150001800 | 20.040746449 |
| N49 | 9.879233287 | 1.272774984 | 17.927771680 |
| N50 | 7.078701604 | 0.754448368 | 17.867933142 |
| N51 | 4.734599809 | 1.327293012 | 19.877146284 |
| N52 | 2.060507332 | 0.687132047 | 19.921335538 |

|     |             |             |              |
|-----|-------------|-------------|--------------|
| N53 | 0.497697994 | 9.140464708 | 17.919288140 |
| N54 | 3.309226737 | 9.624902364 | 17.855724858 |
| N55 | 5.654822330 | 9.096564360 | 19.956731502 |
| N56 | 8.349068539 | 9.723758066 | 19.922444188 |
| N57 | 9.818761046 | 4.000308801 | 18.061594735 |
| N58 | 7.075889480 | 4.464844663 | 17.947328781 |
| N59 | 5.152119284 | 5.154550537 | 20.324827529 |
